# Supplementary material
Source: PubMed Central journal article supplement (PMC9245580)
Supplement: NIHMS1813173-supplement-Supplementary.pdf [file NIHMS1813173-supplement-Supplementary.pdf]

**Table S1. The YxxQ motif-containing proteins identified from Swiss-Port/TrEMBL databases**

| Identity | Name of entry   | Accession number | Species | Fragment size (aa) |
|----------|-----------------|------------------|---------|--------------------|
| CoAA     | CoAA            | Q96PK6           | human   | 669                |
|          | SYT-IP          | O75932           | human   | 669                |
|          | CoAA            | Q920B2           | rat     | 278                |
|          | RBM14           | Q91Z21           | mouse   | 618                |
|          | 16 kDa protein  | Q62019           | mouse   | 573                |
|          | RBM14           | Q9DBI6           | mouse   | 669                |
|          | EST             | Q8C2Q3           | mouse   | 669                |
| EWS      | EWS             | Q01884           | human   | 656                |
|          | EWS-Fli         | Q9BZD1           | human   | 476                |
|          | FLJ31747 (EWS)  | Q96MX4           | human   | 661                |
|          | Similar to EWS  | Q9BWA2           | human   | 354                |
|          | FLJ32119 (EWS)  | Q96MN4           | human   | 600                |
|          | Similar to EWS  | Q96FE8           | human   | 655                |
|          | EWS fragment    | Q7Z6Z3           | human   | 75                 |
|          | EWS homolog     | Q9D2P0           | mouse   | 655                |
|          | EWS             | Q61545           | mouse   | 655                |
|          | EWS             | Q6NVA3           | mouse   | 656                |
| FUS      | FUS             | P35637           | human   | 526                |
|          | FUS-ATF1        | Q9H4A8           | human   | 226                |
|          | Fusion t(12,16) | Q8TBR3           | human   | 526                |
|          | FUS-CHOP        | Q16273           | human   | 126                |
|          | FUS-like        | Q13344           | human   | 528                |
|          | FUS             | P56959           | mouse   | 518                |
|          | Similar to FUS  | Q91VQ2           | mouse   | 280                |
|          | Similar to FUS  | Q8CFQ9           | mouse   | 517                |
|          | FUS             | Q28009           | bovine  | 512                |
| TAFII68  | TAFII68         | Q92804           | human   | 592                |
|          | TAFII68         | Q86X94           | human   | 501                |
|          | TAFII68         | Q8BQ46           | mouse   | 557                |
| SYT      | SYT             | Q15532           | human   | 418                |
|          | SYT homolog-1   | Q75177           | human   | 396                |
|          | SS18 (SYT)      | Q6FGL9           | human   | 391                |
|          | SS18L1          | Q8NE69           | human   | 396                |
|          | SYT fragment    | Q8TDQ9           | human   | 414                |
|          | SYT             | Q62280           | mouse   | 418                |

|        |                           |        |       |      |
|--------|---------------------------|--------|-------|------|
|        | SS18                      | Q6P1I1 | mouse | 392  |
|        | SS18-like1                | Q7TQF3 | mouse | 402  |
| BAF250 | SWI/SNF p270              | O14497 | human | 1902 |
|        | SWI/SNF subunit OSA1      | Q8NFD6 | human | 1999 |
|        | Chromatin remodeling p250 | Q9BY33 | human | 1939 |
|        | SWI related               | Q96TA9 | human | 1208 |
|        | OSA1                      | Q96T89 | human | 1685 |
|        | BRG1-associated 250a      | Q9HBJ5 | human | 2285 |
|        | OSA1                      | Q925Q1 | mouse | 1902 |

---

The protein databases of Swiss-Port (release 44.3; 156998 entries) and TrEMBL (release 27.3; 1379120 entries) were analyzed with ScanProsite program. Prosite format scanned for the YxxQ motifs: Y- $\{P\}(1,2)$ -Q(1,2)-X(1,4)-Y- $\{P\}(1,2)$ -Q(1,2)-X(1,4)-Y- $\{P\}(1,2)$ -Q(1,2). The taxonomic species filter was set as *Homo sapiens*, *Mus musculus*, *Rattus norvegicus*, and *Bos taurus*.

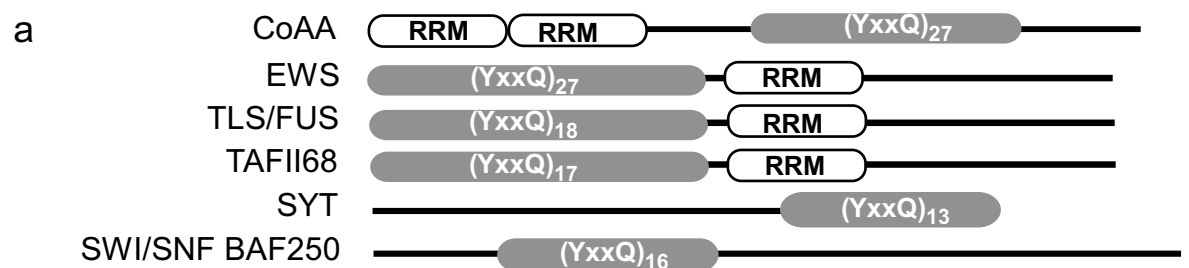

b

**CoAA** *Q96PK6* 669aa (211-570 is shown)

```

GRDRSPLRRS PPRASYVAPL TAQPATYRAQ PSVSLGAAYR AQPSASLGVG YRTQPMTAQA 270
ASYRAQPSVS LGAPYRGQLA SPSSQSAAAS SLGPYGAQPS SASALSSYGG QAAAASSLNS 330
YGAQGSSLAS YGNQPSSYGA QAASSYGVRA AASSYNTQGA ASSLGSYGAQ AASYGAQSAA 390
SSLAYGAQAA SYNAQPSASY NAQSAPYAAQ QAASYSSQPA AYVAQPATAA AYASQPAYAA 450
AQATTPMAGS YGAQPVVQTQ LNSYGAQASM GLSGSYGAQS AAAATGSYGA AAYGAQPSA 510
TLAAPYRTQS SASLAASYAA QQHPQAAASY RGQPGNAYDG AGQPSAAYLT MSQGAVANAN 570

```

**EWS** *Q01844* 656aa (1-300 is shown)

```

MASTDYSTYS QAAAQOGYSA YTAQPTQGYA QTTQAYGQOS YGTYGQPTDV SYTQAQTTAT 60
YGQTAYATSY GQPPTGYTTP TAPQAYSQPV QGYGTGAYDT TTATVTTTQA SYAAQSAYGT 120
QPAYPAYGQQ PAATAPTRPQ DGNKPTETSQ PQSSTGGYNQ PSLGYGQSNY SPQVPGSYP 180
MQPVTAPPSY PPTSYSSTQP TSYDQSSYSQ QNTYGQPSSY GQSSYGQOS SYGQPPTSY 240
PPQTGSYSQA PSQYSQSSS YGQSSFRQD HPSSMGVYGQ ESGGFSGPGE NRSMSGPDNR 300

```

**TLS/FUS** *P35637* 526aa (1-240 is shown)

```

MASNDYTQQA TQSYGAYPTQ PGQYSQSS QPYGQYSSG YSQSTDTSGY GQSSYSYGQ 60
SQNTGYGTQS TPQGYGSTGG YGSSQSSQSS YGQSSYPGY GQPPAPSSTS GSYGSSSQSS 120
SYGQPQSGSY SQQPSYGGQ QSYGQQSYN PPQYGQQNQ YNSSSGGGG GGGGYGQD 180
QSSMSSGGGS GGGYGNQDQS GGGGSGYGQ QDRGGRGRGG SGGGGGGGGG GYNRSSGGYE 240

```

**TAFII68** *Q92804* 592aa (1-180 is shown)

```

MSDSGSYGQS GGEQSYSTY GNPGSQYGQ ASQSYSGYGQ TTDSSYGQNY SGYSSYGQSQ 60
SGYSQSYGGY ENQKQSSYSQ QPYNNQGOQ NMESSGSQGG RAPSYDQPY GQDSYDQQ 120
GYDQHQGSYD EQSNYDQQHD SYSQNQQSYH SQRENYSHHT QDDRRDVSRY GEDNRGYGGS 180

```

**SYT** *Q15532* 418aa (221-418 is shown)

```

GGQHYQQQP PMGMMGQVNQ GNHMMGQRQI PPYRPPQQGP PQQYSGQEDY YGDQYSHGGQ 280
GPPEGMNQY YPDGHNDYGY QQPSYPEQGY DRPYEDSSQH YYEGGNSQYG QQDAYQQPP 340
PQQGYPPQQQ QYPGQQYYPG QQQGYGPSQG GPGPQYPNYP QGQQQYGGY RPTQQPPQ 400
PQQRYGYYDQ GQYGNYQQ

```

**BAF250** *Q8NFD6* 1999aa (61-360 is shown)

```

AAASGGAQQR SHHAPMSPGS SGGGGQPLAR TPQPSSPMDQ MGKMRPQYYG GTNPYSQQQG 120
PPSGPQQGHG YPGQYGSQT PQRYPMTMQG RAQSAMGGLS YTQQIYPPYGQ QGYSGYGQQ 180
QTPYYNQQSP HPQQQQPPYS QPPSQTPHA QPSYQQQQPS QPPQLQSSQP PYSQQPSQQPP 240
HQQSPAPYPS QQSTTQQHPQ SQPPYSQQPA QSPYQQQQPPQ QPAPSTLSQQ AAYPPQQPSQQ 300
SQQTAYYSQQR FPPPQELSQD SFGSQASSAP SMTSSKGGQE DMNLSLQSRP SSLPDLYSGSI 360

```

**Figure S1 The YxxQ-containing proteins.** A. Schematic representation of CoAA, EWS, TLS/FUS, TAFII68, SYT, and SWI/SNF BAF250 structures in which RRM domains are shown as open boxes and repeated tyrosine- and glutamine-rich sequences (YxxQ) are shown as filled boxes with number of repeats indicated. B. The YxxQ-containing sequences from each protein are shown, with their tyrosine residues (Y) highlighted, and residues within the motif including glutamine residues (Q) shaded. The YxxQ, YxQQ, and YxQ sequence patterns are selected and shown.

## Figure S2 Primer pairs used in PCR analysis.

P1-F: AAGAGCGCGGGCACAGCAAC  
P1-B: CGGGATGTGGAGCGAAGGTCA

P2-F: AGGAGGCTGAGTTGGGAGGAT  
P2-B: AGGAGGCTCTGGGAGGAAAGG

P3-F: CCAGCCCATTTTTATTGAGTTCCT  
P3-B: CCAAGGCTGAAAGGTAACCCTCTA

P4-F: GCCGGCATGATCTTCCCTCAGAGGATG  
P4-B: AGGACTTGGAGTAATCAAGGGAAC TA

P5-F: CGACGGGGCGGATACGACTCCGGAGGA  
P5-B: GCACTTCCCCACCCCTCCCA

P6-F: CTTCGACTACCAGCAGGCTTTT  
P6-B: ~~GAATACACCCAGGAGACTGCC~~ Erratum: CCGTCAGAGGAGCCACATAAG

P7-F: GTATGGTTCCGACCGCGTTTAGCCGAG  
P7-B: GCTGCTCTCGAGCTACATGCGGCGCTGGT

P8-F: GGTACTGTCCGCAAGGTT CATGTG  
P8-B: TCTGTTGAAGGCTTGGGGATGG

P9-F: CTGCTCTGTGTAGGGCTCGTCC  
P9-B: CATCAGGCTGCACAGGCGG

P10-F: CCACAAGCTAGACCATCAGGAAGG  
P10-B: GCAACAGCAGGTGAATCAAAGTAGG

P11-F: TGAGACCCTGTGCCAGCCCTG  
P11-B: GCCGGAATACCATCAGCCACA

P12-F: ACCAAGAACCTGAAGCCTGTACCC  
P12-B: GTGAAACAGCTCAGCTCCAGC

P13-F: AGTCGCGCCACCAGCATCTTC  
P13-B: GGTGACGTTGGGATCCAGGGTAA

P14-F: CCTCGGTGTCCTACTTCAAAT  
P14-B: TCCAGGTGGCGACGATCTTC

P15-F: GCCGGCATGATCTTCCCTCAGAGGATG  
P15-B: AACATAGACATGTGACAAACTCAGGGAA

P16-F: CTGCCAGGACCTCAGCAACCCCAGG  
P16-B: TGAGTGTACGGGGGAAGGCCGG

P17-F: TCGCTGGACGCGCGGGATGCGAGTCCCC  
P17-B: CCACCTTCTGGAGAGCCCCGGACCTCT

TRalpha-F: TCACCTGGCAACTTCAATGC  
TRalpha-B: CCTGATTTTCCAGCGATGT

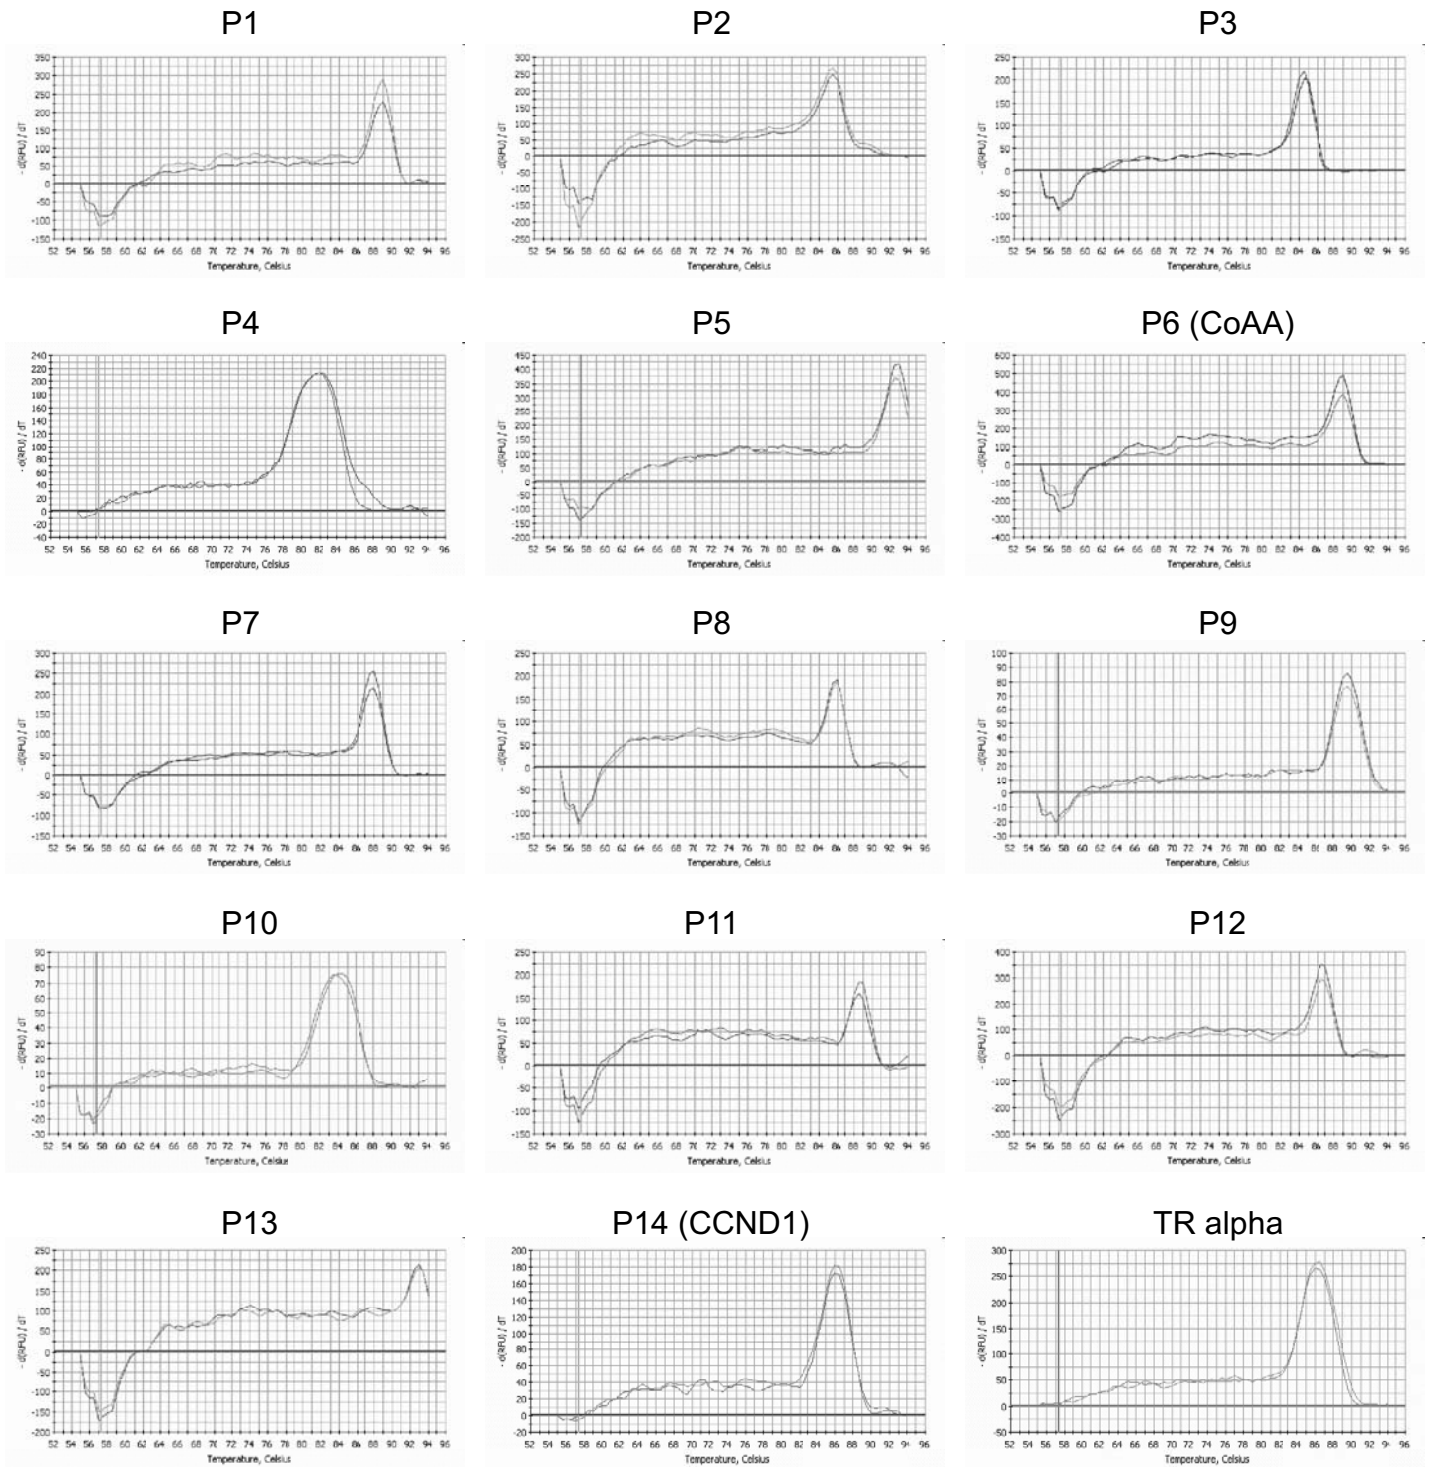

**Figure S3 Dissociation curve.** Primer pairs used in amplicon mapping were assayed in duplicate using normal genomic DNA as template.

Amplification graph

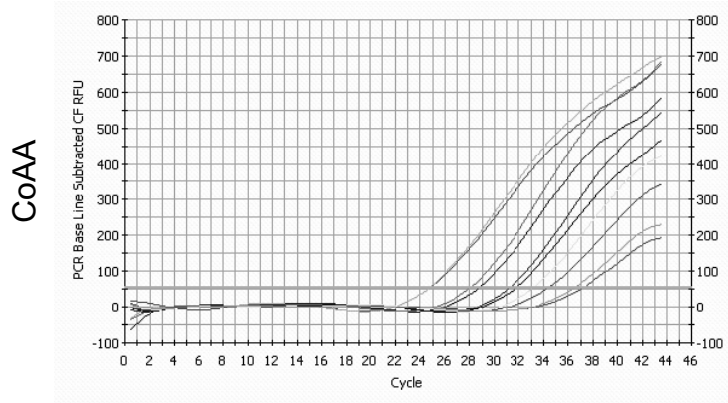

CoAA

Standard curve

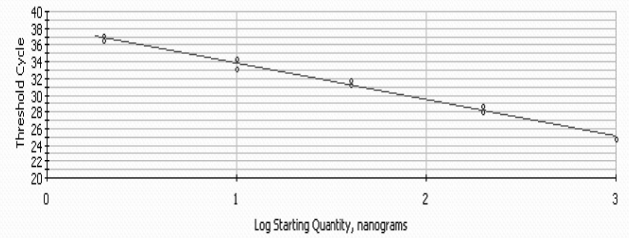

CCND1

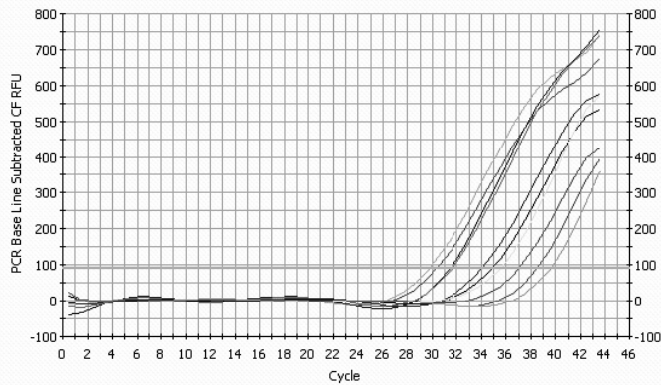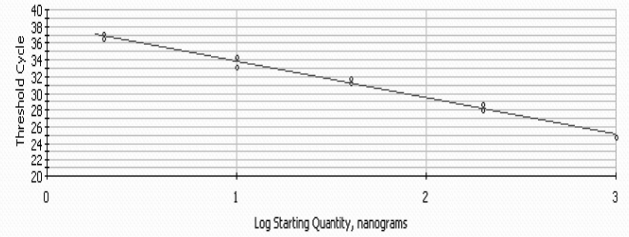

TR $\alpha$

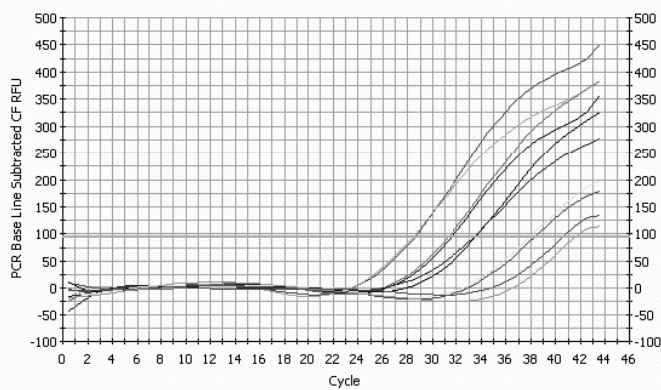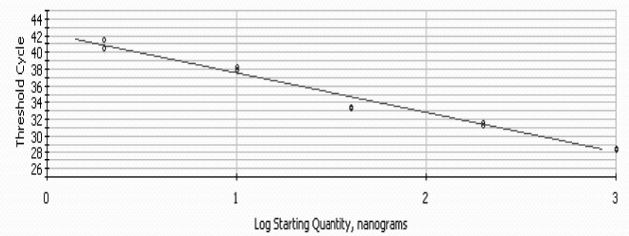

**Figure S4 Standard curves of real-time PCR analysis.** Standard curves of PCR for CoAA, CCND1 and TR $\alpha$  were generated by using serial dilutions of normal human genomic DNA as template.

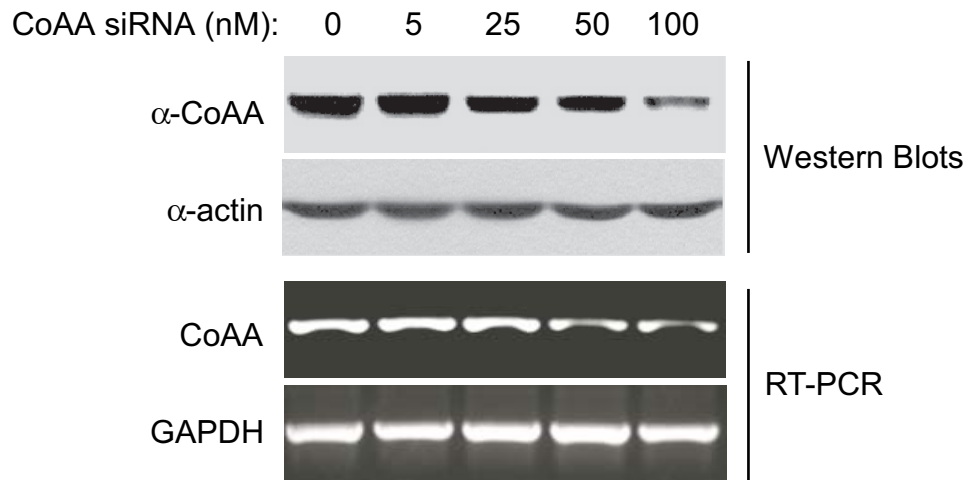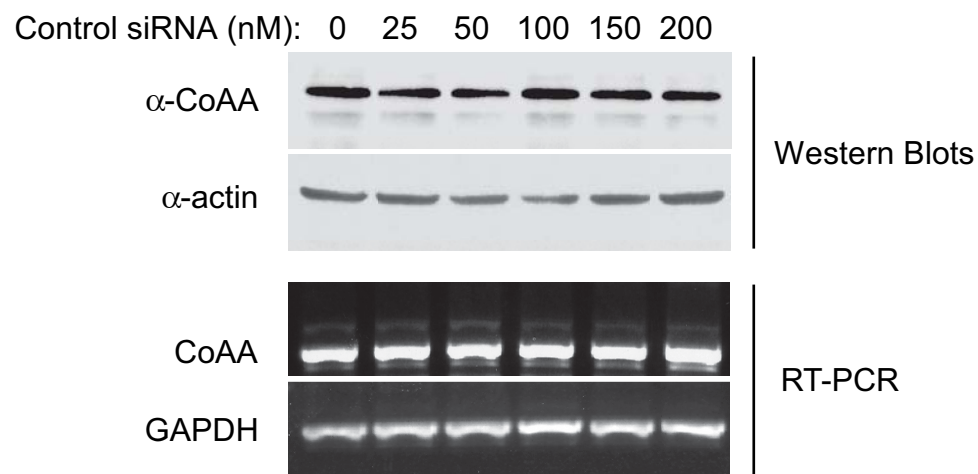

**Figure S5 siRNA of CoAA.** CoAA or control siRNA was transfected in cells at increasing concentrations as indicated. Western blots were carried out using anti-CoAA and anti-actin antibodies. RT-PCR was performed using CoAA and GAPDH primer pairs. The results suggested that siRNA of CoAA inhibits CoAA mRNA and protein expression.

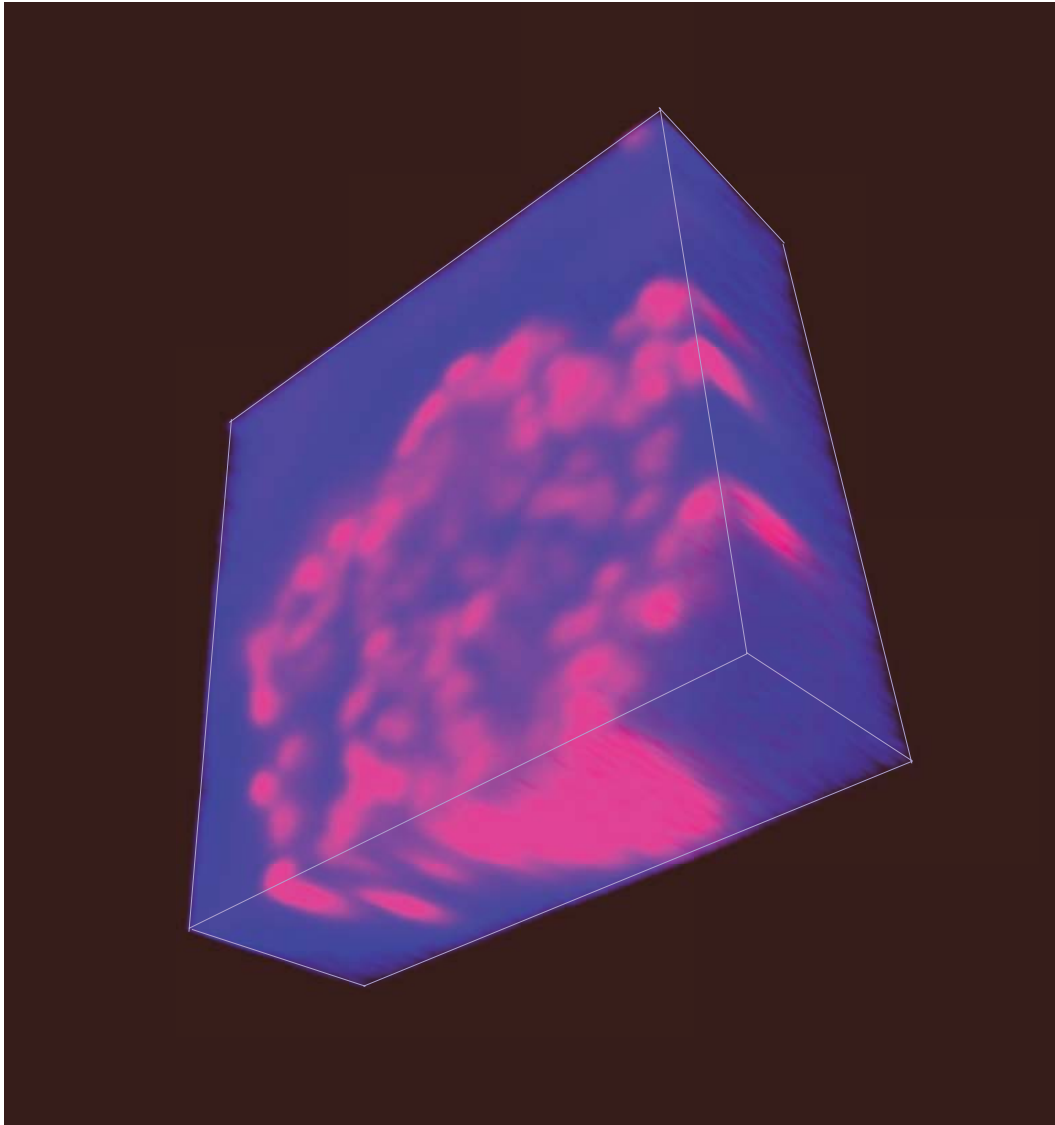

**Figure S6** Three dimensional scanning of a single nucleus from a squamous cell lung carcinoma with amplified CoAA gene stained by fluorescent *in situ* hybridization (FISH) (red). The slide is counterstained with DAPI (blue).
